# Supplementary material for: Organophosphonic acid and cerium functionalized antimonotungstate with electrochemical promise in biosensing bacterial dissimilatory sulfite reductase gene sequence
Source: Royal Society of Chemistry journal article supplement (doi:10.1039/d3qm00062a), 2023-01-01
Supplement: d3qm00062a1.pdf [file d3qm00062a1.pdf]

Electronic Supplemental information

**Organophosphonic acid and cerium functionalized antimonotungstate with electrochemical promise in biosensing bacterial dissimilatory sulfite reductase gene sequence**

Zhigang Tang,<sup>a</sup> Wenshu Zhang,<sup>a</sup> Yalun Hu,<sup>a</sup> Xiaodan Jia,<sup>a</sup> Lina Meng,<sup>a</sup> Dan Wang,<sup>a,b,\*</sup> Lijuan Chen,<sup>a,\*</sup> and Junwei Zhao<sup>a,\*</sup>

<sup>a</sup> Henan Key Laboratory of Polyoxometalate Chemistry, College of Chemistry and Chemical Engineering, Henan University, Kaifeng 475004, China

<sup>b</sup> Henan Province Engineering Research Center of High Value Utilization to Natural Medical Resource in Yellow River Basin, School of Pharmacy, Henan University, Kaifeng 475004, China

**Fig. S1** (a) Structure of Eu<sup>3+</sup>-embedded [Eu<sub>3</sub>(H<sub>2</sub>O)<sub>3</sub>(SbW<sub>9</sub>O<sub>33</sub>)(W<sub>5</sub>O<sub>18</sub>)<sub>3</sub>]<sup>18-</sup>.<sup>6</sup> (b) Structure of TM-embedded [M<sub>2</sub>Sb<sub>2</sub>W<sub>20</sub>O<sub>70</sub>(H<sub>2</sub>O)<sub>6</sub>]<sup>(14-2n)-</sup> (M<sup>n+</sup> = Co<sup>2+</sup>, Ni<sup>2+</sup>, Mn<sup>2+</sup> or Fe<sup>3+</sup>).<sup>7</sup> (c) Structure of [(SbW<sub>9</sub>O<sub>33</sub>)<sub>4</sub>{WO<sub>2</sub>(H<sub>2</sub>O)<sub>2</sub>Ce<sub>3</sub>(H<sub>2</sub>O)<sub>8</sub>(Sb<sub>4</sub>O<sub>4</sub>)]<sup>19-</sup>.<sup>8</sup> (d) Structure of {[Ln<sub>4</sub>(H<sub>2</sub>O)<sub>6</sub>Sb<sub>6</sub>O<sub>4</sub>](SbW<sub>10</sub>O<sub>37</sub>)<sub>2</sub>(SbW<sub>8</sub>O<sub>31</sub>)<sub>2</sub>]<sup>22-</sup> (Ln = Dy<sup>3+</sup>, Er<sup>3+</sup>, Y<sup>3+</sup>, Ho<sup>3+</sup>).<sup>9</sup> (e) Structure of [Sb<sup>III</sup><sub>9</sub>Sb<sup>V</sup>Ln<sub>3</sub>O<sub>14</sub>(H<sub>2</sub>O)<sub>3</sub>](SbW<sub>9</sub>O<sub>33</sub>)<sub>3</sub>(PW<sub>9</sub>O<sub>34</sub>)<sub>3</sub>]<sup>23-</sup> (Ln = Ce<sup>3+</sup>, Sm<sup>3+</sup>, Eu<sup>3+</sup>, Gd<sup>3+</sup>, Tb<sup>3+</sup>, Dy<sup>3+</sup>).<sup>10</sup> (f) Structure of [Sb<sub>15</sub>Tb<sub>7</sub>W<sub>3</sub>O<sub>29</sub>(OH)<sub>3</sub>(DMF)(H<sub>2</sub>O)<sub>6</sub>(SbW<sub>8</sub>O<sub>30</sub>)(SbW<sub>9</sub>O<sub>33</sub>)<sub>5</sub>]<sup>27-</sup>.<sup>11</sup> (g) Structure of [Sb<sub>7</sub>W<sub>36</sub>O<sub>133</sub>Ln<sub>3</sub>M<sub>2</sub>(CH<sub>3</sub>COO)(H<sub>2</sub>O)<sub>8</sub>]<sup>17-</sup> (Ln = La<sup>3+</sup>–Gd<sup>3+</sup>, M = Co<sup>2+</sup>; Ln = Ce<sup>3+</sup>, M = Ni<sup>2+</sup>, Zn<sup>2+</sup>).<sup>12</sup> (h) Structure of [Ln<sub>3</sub>Ni<sub>9</sub>(OH)<sub>9</sub>(SbW<sub>9</sub>O<sub>33</sub>)<sub>2</sub>(PW<sub>9</sub>O<sub>34</sub>)<sub>3</sub>(CH<sub>3</sub>COO)<sub>3</sub>]<sup>30-</sup> (Ln = Dy<sup>3+</sup>, Er<sup>3+</sup>).<sup>13</sup> (i) Structure of {[Ln<sub>3</sub>(CH<sub>3</sub>COO)<sub>3</sub>(HPO<sub>3</sub>)(WO<sub>4</sub>)] [B- $\alpha$ -SbW<sub>9</sub>O<sub>33</sub>]<sub>3</sub>]<sup>25-</sup> (Ln = Eu<sup>3+</sup>, Dy<sup>3+</sup>, Ho<sup>3+</sup>, Er<sup>3+</sup>).<sup>14</sup> (j) Structure of [Ln(H<sub>2</sub>O)<sub>8</sub>]<sub>2</sub>[Fe<sub>4</sub>(H<sub>2</sub>O)<sub>8</sub>(thr)<sub>2</sub>][B- $\beta$ -SbW<sub>9</sub>O<sub>33</sub>]<sub>2</sub> (thr = L-threonine, Ln = Pr<sup>3+</sup>, Nd<sup>3+</sup>, Sm<sup>3+</sup>, Eu<sup>3+</sup>, Gd<sup>3+</sup>, Dy<sup>3+</sup>, Lu<sup>3+</sup>).<sup>15</sup> (k) Structure of [Ln<sub>4</sub>(HP<sup>III</sup>)W<sub>8</sub>(H<sub>2</sub>O)<sub>12</sub>(H<sub>2</sub>ptca)<sub>2</sub>O<sub>28</sub>][SbW<sub>9</sub>O<sub>33</sub>]<sub>2</sub>]<sup>12-</sup> (H<sub>3</sub>ptca = 1,2,3-propanetricarboxylic acid, Ln = La<sup>3+</sup>, Ce<sup>3+</sup>, Pr<sup>3+</sup>).<sup>16</sup> (l) Structure of [Ln<sub>4</sub>(H<sub>2</sub>O)<sub>14</sub>W<sub>7</sub>O<sub>15</sub>(H<sub>2</sub>MA)<sub>4</sub>][SbW<sub>9</sub>O<sub>33</sub>]<sub>2</sub>[HP<sup>III</sup>Sb<sup>III</sup>W<sub>15</sub>O<sub>54</sub>]<sub>2</sub>]<sup>20-</sup> (H<sub>3</sub>MA = DL-malic acid, Ln = Pr<sup>3+</sup>, Nd<sup>3+</sup>).<sup>17</sup> (m) Structures of [Ln<sub>2</sub>(H<sub>2</sub>O)<sub>4</sub>{WO<sub>2</sub>(pic)}<sub>2</sub>(SbW<sub>8</sub>O<sub>30</sub>)<sub>2</sub>]<sup>10-</sup> (Ln = La<sup>3+</sup>, Pr<sup>3+</sup>) and {[Ln(H<sub>2</sub>O)]{Ln(pic)}(Sb<sub>3</sub>O<sub>4</sub>)(SbW<sub>8</sub>O<sub>31</sub>)(SbW<sub>10</sub>O<sub>35</sub>)<sub>2</sub>]<sup>24-</sup> (Hpic = picolinic acid, Ln = Tb<sup>3+</sup>, Dy<sup>3+</sup>, Ho<sup>3+</sup>).<sup>18</sup> (n) Structure of [Ce(H<sub>2</sub>O)<sub>5</sub>(2,6-pdca)]<sub>4</sub>[Fe<sub>4</sub>(H<sub>2</sub>O)<sub>6</sub>(B- $\beta$ -SbW<sub>9</sub>O<sub>33</sub>)<sub>2</sub>]<sup>2-</sup> (2,6-H<sub>2</sub>pdca = 2,6-pyridine-dicarboxylic acid).<sup>19</sup> Color codes: C, black; O, red; N, blue; Ln, plum; TM, yellow; Sb, orange; P, rose; W, turquoise balls; pale blue octahedra).

**Fig. S2** Comparison of experimental PXRD and the corresponding simulated XRD patterns of **1**.

**Fig. S3** The IR spectrum of **1**.

**Fig. S4** The TG curve of **1**.

**Fig. S5** The {Ce<sub>3</sub>W<sub>8</sub>(Hgps)<sub>2</sub>} core surrounded by four trivacant {SbW<sub>9</sub>} SBUs via twelve  $\mu_2$ -O and ten  $\mu_3$ -O atoms.

**Fig. S6** The dihedral angle between the Sb1W<sub>9</sub>–Sb2W<sub>9</sub>–Sb3W<sub>9</sub> plane and Sb2W<sub>9</sub>–Sb3W<sub>9</sub>–Sb4W<sub>9</sub> plane in **1a**.

**Fig. S7** (a) The dumbbell-shaped heterometallic {Ce<sub>3</sub>W<sub>8</sub>(Hgps)<sub>2</sub>} cluster in **1a** and the breakdown drawing of the {Ce<sub>3</sub>W<sub>8</sub>(Hgps)<sub>2</sub>} cluster. (b) Combination of Hgps<sup>4-</sup>, {CeW<sub>4</sub>} and Ce<sup>23+</sup>.

**Fig. S8** (a) Structure of **1a**. (b) Structure of **1a** after the removal of Hgps<sup>4-</sup> ligands.

**Fig. S9** The monocapped square antiprismatic geometries of Ce<sup>13+</sup> and Ce<sup>33+</sup> ions and the bicapped trigonal prismatic configuration of the Ce<sup>23+</sup> ion.

**Fig. S10** (a–c) Packing architectures of **1** with a regular –ABAB– arrangement fashion in *bc*, *ac* or *ab* planes. (d–f)

Simplified quadrilateral of the **1a** polyanion viewed along *bc*, *ac* or *ab* planes. (g–i) Simplified packing representations of **1a** polyanions viewed along *bc*, *ac* or *ab* plane.

**Fig. S11** (a) Hydrogen-bonding interactions between N atoms on  $[\text{H}_2\text{N}(\text{CH}_3)_2]^+$  cations and surface O atoms of **1a** polyanions. (b) The distances between donor N9 atom and acceptor O atoms.

**Fig. S12** (a) A mixture of **1**, GO and  $\text{N}_2\text{H}_4$  after reaction for 2 h at 60°C. (b) A mixture of GO and  $\text{N}_2\text{H}_4$  after reaction for 2 h at 60°C.

**Fig. S13** (a) Comparison of IR spectra of **1'**(red) obtained by re-precipitating **1** with using CsCl in water and **1** (blue). (b) Comparison of Raman spectra of **1** in water solution (black) and **1** in solid state (red). It's worth noting that the low signal intensity of **1** in water is most likely due to low solubility of **1**. (c) Comparison of UV-vis spectra of **1** in water under different storage times.

**Fig. S14** The ESI-MS spectrum of **1** in aqueous solution and peak assignments with proposed formula and charge.

**Fig. S15** The TEM-EDS elemental mapping images for the rGO-**1** with W, Sb, Ce, P, C and N elements.

**Fig. S16** (a) IR spectra of GO, **1**, rGO-**1** and Au-rGO-**1**. (b) IR spectra of GO, **1** and rGO-**1**. (c) Raman spectra of GO, **1**, rGO-**1** and Au-rGO-**1**.

**Fig. S17** The SEM-EDS elemental mapping images for the Au-rGO-**1** with W, Au, C, N, Sb, Ce and P elements.

**Fig. S18** The Zeta potentials of GO, rGO-**1** and Au-rGO-**1**.

**Fig. S19** (a) SWV curves of Au-rGO-**1**/GCEs stored for different times at room temperature in the  $[\text{Fe}(\text{CN})_6]^{3-/4-}-\text{K}$  solution. (b) SWV curves of bare GCEs stored for different times at room temperature in the  $[\text{Fe}(\text{CN})_6]^{3-/4-}-\text{K}$  solution.

**Fig. S20** Schematic preparation of Au-rGO-**1**/GCE.

**Fig. S21** CV curves of each modified electrode (bare GCE, Au-rGO-**1**/GCE, c-DNA/Au-rGO-**1**/GCE, MH-treated c-DNA/Au-rGO-**1**/GCE, dsDNA/Au-rGO-**1**/GCE and MB/dsDNA/Au-rGO-**1**/GCE) in the  $[\text{Fe}(\text{CN})_6]^{3-/4-}-\text{K}$  solution.

**Fig. S22** (a) SWV curves of MB/dsDNA/Au-rGO-**1**/GCEs constructed by using different concentrations of t-DNA ( $10^{-14}$  /  $10^{-13}$  /  $10^{-12}$  /  $10^{-11}$  /  $10^{-10}$  /  $10^{-9}$  /  $10^{-8}$  /  $10^{-7}$  M). (b) SWV curves of the specificity of MB/dsDNA/Au-rGO-**1**/GCE EDB for different DNA sequences. (c) SWV curves of the anti-interference capability of MB/dsDNA/Au-rGO-**1**/GCE EDB different interference DNA sequences. (d) The time-dependent stability of MB/dsDNA/Au-rGO-**1**/GCE EDB for t-DNA detection after stored for 2, 3, 4, 5, 6 and 7 days. (e) The repeatability of five MB/dsDNA/Au-rGO-**1**/GCE EDBs. (f) SWV curves of MB/dsDNA/Au-rGO-**1**/GCEs constructed by using different concentrations of t-DNA ( $10^{-13}$  /  $10^{-12}$  /  $10^{-11}$  /  $10^{-10}$  /  $10^{-9}$  /  $10^{-8}$  M) in human serum solution diluted 1000 times by using the Tris–HCl solution.

**Table S1** Brief summary of experimental conditions of OLLFATs.

**Table S2** Experimental explorations on the synthesis of **1**.

**Table S3** Crystallographic data and structure refinements for **1**.

**Table S4** Comparison of the sensitivity of different EDBs for DNA sequence detection.

## Materials and physical measurements

The chemicals and reagents are commercially purchased and used without further purification. Elemental analyses (carbon, hydrogen and nitrogen) were measured on a Vario EL Cube CHNS analyzer. IR spectra were collected from a solid sample palletized with KBr on a Bruker VERTEX 70 IR spectrometer in the range 400–4000  $\text{cm}^{-1}$ . Inductively coupled plasma atomic emission spectrometry (ICP–AES) was performed on a Perkin–Elmer Optima 2000 ICP–AES spectrometer. Powder X-ray diffraction (PXRD) pattern was obtained with Bruker D8 ADVANCE apparatus using Cu  $K\alpha$  radiation ( $\lambda = 1.54056 \text{ \AA}$ ) at room temperature. The thermogravimetric (TG) analysis was carried out on a Mettler-Toledo TGA/SDTA 851<sup>e</sup> thermal analyze instrument under  $\text{N}_2$  atmosphere with temperature ranging from 25  $^\circ\text{C}$  to 1000  $^\circ\text{C}$  (heating rate: 10  $^\circ\text{C min}^{-1}$ ). Scanning electron microscopy (SEM) images were recorded on a Carl Zeiss Gemini 500 field-emission scanning electron microscope equipped with energy-dispersive spectrometer (EDS). Transmission electron microscopy (TEM) images were obtained on a JEM–F200 electron microscope equipped with energy-dispersive spectrometer (EDS). Electrospray ionization mass spectrometry (ESI-MS) was performed on an AB SCIEX Triple TOF 4600 instrument. X-ray photoelectron spectroscopy (XPS) measurements were conducted using a ThermoFischer ESCALAB 250X instrument. The zeta potential was recorded on a Zetasizer NanoZS90 instrument. UV-vis spectra were recorded on a Mapada UV-6100 UV-vis spectrometer in the range of 190–600 nm in aqueous solution. Raman spectra were recorded on an Edinburgh RM5 Raman spectrometer with an excitation laser at 532 nm. Electrochemical tests were carried out by means of a CHI660E electrochemical workstation (Shanghai Chenhua Instruments, China) with a three-electrode system (modified GCE as working electrode, Ag/AgCl as reference electrode, and platinum column electrode as counter electrode). Cyclic voltammetry (CV) and Square wave voltammetry (SWV) were recorded in the 10.0 mM  $\text{K}_3[\text{Fe}(\text{CN})_6]$  /  $\text{K}_4[\text{Fe}(\text{CN})_6]^{4-}$  (1:1) solution containing and 100 mM KCl (marked as  $[\text{Fe}(\text{CN})_6]^{3-/4-}$ -K) and the Tris–HCl solution (0.10 M tris(hydroxymethyl)aminomethane hydrochloride buffer solution containing 20.0 mM NaCl, pH = 8.00).

## X-ray crystallography

Diffraction intensity data of a high-quality single-crystal of **1** were collected on a Bruker D8 Venture Photon II diffractometer with Mo  $K\alpha$  radiation ( $\lambda = 0.71073 \text{ \AA}$ ) at 150 K. Direct methods were used to solve the structure of **1** and locate the heavy atoms. The structure was refined on  $F^2$  by full-matrix least-squares method using the SHELXTL 97 program.<sup>1,2</sup> The remaining atoms were found from successive full-matrix least-squares refinements on  $F^2$  and Fourier syntheses. All hydrogen atoms attached to carbon and nitrogen atoms were geometrically placed and refined isotropically as a riding model using the default SHELXTL parameters. No hydrogen atoms associated with water molecules were located from the difference Fourier map. All non-hydrogen atoms except for some Na, C, N, O and some water atoms were refined anisotropically. In the refinement of **1**, sixty-two lattice water molecules and seven  $[\text{H}_2\text{N}(\text{CH}_3)_2]^+$  cations in the molecular unit were found from the Fourier maps. However, there are still solvent accessible voids in the check cif report of crystal structure of **1**, indicating that some lattice water molecules or cations should exist in the structure that can't be found from the weak residual electron peaks. Therefore, on the basis of charge balance, elemental analysis and TG analysis, two  $[\text{H}_2\text{N}(\text{CH}_3)_2]^+$  cations six protons and four lattice water molecules were directly added to the molecular formula of **1**. This phenomenon that organoanime cations and lattice are directly added to the molecular formula according to the results of elemental

analysis and TG analysis is very common in POM compounds.<sup>3-5</sup> The crystallographic data and structure refinement parameters for **1** are demonstrated in Table S3. The cif file of **1** reported in this paper has been deposited at the Cambridge Crystallographic Data Centre with CCDC 2236459, which can be obtained free of charge from the Cambridge Crystallographic Data Centre via [www.ccdc.cam.ac.uk/data\\_request/cif](http://www.ccdc.cam.ac.uk/data_request/cif).

#### **Preparation of the SbCl<sub>3</sub> solution**

The solid SbCl<sub>3</sub> (13.700 g, 0.060 mol) was completely dissolved in hydrochloric acid (HCl) solution (6.0 M, 60.00 mL). The concentration of Sb<sup>3+</sup> ions is 1.000 mM.

#### **Synthesis of the rGO-1 composite material**

Graphene oxide (GO, 15.000 mg) was dispersed into water (5.00 mL), forming the GO colloidal dispersion (3.00 mg mL<sup>-1</sup>) and sonicated for 4 h. Then, **1** (70.000 mg) in 1.00 mL water and hydrazine hydrate (0.20 mL, 80 wt%) were added into the above dispersion. The resultant mixture was kept at 60 °C for 2 h and cooled to room temperature. Then, the rGO-1 composite material was formed and washed three times by using 5.00 mL N,N-dimethylformamide (DMF) per time and lyophilized for one day.

#### **Synthesis of the Au-rGO-1 composite material**

Graphene oxide (GO, 15.000 mg) was dispersed into water (5.00 mL), forming the GO colloidal dispersion (3.00 mg mL<sup>-1</sup>) and sonicated for 4 h. Then, **1** (70.000 mg) in 1.00 mL water, HAuCl<sub>4</sub>·3H<sub>2</sub>O solution (10.00 mg mL<sup>-1</sup>, 0.20 mL) and hydrazine hydrate (0.20 mL, 80 wt%) were added into the above dispersion. The resultant mixture was kept at 60 °C for 2 h and cooled to room temperature. Then, the Au-rGO-1 composite material was formed and washed three times by using 5.00 mL DMF per time and lyophilized for one day.

#### **Synthesis of the p-GO composite material**

Graphene oxide (GO, 15.000 mg) was dispersed into water (5.00 mL), forming the GO colloidal dispersion (3.00 mg mL<sup>-1</sup>) and sonicated for 4 h. Then, hydrazine hydrate (0.20 mL, 80 wt%) was added into the above dispersion. The resultant mixture was kept at 60 °C for 2 h and cooled to room temperature. Then, the p-GO composite material was formed and washed three times by using 5.00 mL DMF per time and lyophilized for one day.

#### **Preparations of oligonucleotides and buffer solution used for electrochemical measurement**

All oligonucleotides in this work were purchased from Shanghai Sangon Biological Engineering Technological Co. Ltd. (China) with the following sequences:

Complementary DNA (c-DNA): 5'-HS-ACGTAGTTGTGGTACGGGGCGCG-3'.

Target DNA (t-DNA): 5'-CGCGCCCCGTACCACAACTACGT-3'.

Single-base mismatch DNA (1-MT): 5'-CGCGCCCCGTAGCACAACACTACGT-3'.

Three-base mismatch DNA (3-MT): 5'-CGCGTCCCGTAGCACAACGACGT-3'.

Non-complementary DNA (NC): 5'-AGTACATATCGAGTACCTTCATG-3'.

Tris-ethylenediaminetetraacetic acid (TE) buffer (pH = 7.40) containing 10.0 mM tris(hydroxymethyl) aminomethane and 1.0 mM ethylenediaminetetraacetic acid, was purchased from Innochem (Beijing, China). All of DNAs were dissolved with TE buffer (pH = 7.40).

**Construction process of the MB/dsDNA/Au-rGO-1/GCE EDB is described as follows:**

#### **Preparation of Au-rGO-1/GCE**

GCE was artificially polished to a mirror-like surface using 0.05  $\mu\text{m}$  alumina power on a clean gauze and cleaned with ethanol and water. Then, 5.0  $\mu\text{L}$  suspension of Au-rGO-1 (3.00 mg was dispersed in 1.00 mL DMF under sonication for 1.0 h) was dropped onto the GCE surface and quiescently dried at 37  $^{\circ}\text{C}$ . The formed electrode is donated as Au-rGO-1/GCE.

#### **Preparation of c-DNA/Au-rGO-1/GCE**

Then the 5'-thiolated single-stranded DNA solution (8.0  $\mu\text{L}$ ) was chosen as the complementary DNA (c-DNA,  $1 \times 10^{-6}$  M) and immobilized on the Au-rGO-1/GCE surface and then permitted to stand at room temperature for 2.0 h to adhere to c-DNA strands on the surface of Au-rGO-1/GCE via strong Au-S bands. The formed electrode is donated as c-DNA/Au-rGO-1/GCE.

#### **Preparation of MH-treated c-DNA/Au-rGO-1/GCE**

8.0  $\mu\text{L}$  of 6-mercapto-1-hexanol (MH, 1.0 mM) was covered on the surface of c-DNA/Au-rGO-1/GCE, which was kept at room temperature for 30 min for blocking nonspecific binding-sites of Au nanoparticles and also helping the c-DNA stay in proper orientation for adequate recognition ability. The formed electrode is donated as MH-treated c-DNA/Au-rGO-1/GCE.

#### **Preparation of dsDNA/Au-rGO-1/GCE**

8.0  $\mu\text{L}$  target-DNA (t-DNA) testing solutions containing various concentrations of t-DNA ( $c = 10^{-14} / 10^{-13} / 10^{-12} / 10^{-11} / 10^{-10} / 10^{-9} / 10^{-8} / 10^{-7}$  M) were respectively dropped onto the surface of MH-treated c-DNA/Au-rGO-1/GCEs for 60 min to construct dsDNA/Au-rGO-1/GCEs.

#### **Preparation of MB/dsDNA/Au-rGO-1/GCE**

The MB solution (20  $\mu\text{M}$ , 20.0  $\mu\text{L}$ ) was dropped on the surface of dsDNA/Au-rGO-1/GCE, which was kept for 20 min to sufficiently adsorb MB in order to enhance signal readout. The formed electrode is donated as MB/dsDNA/Au-rGO-1/GCE.



**Fig. S1** (a) Structure of Eu<sup>3+</sup>-embedded [Eu<sub>3</sub>(H<sub>2</sub>O)<sub>3</sub>(SbW<sub>9</sub>O<sub>33</sub>)(W<sub>5</sub>O<sub>18</sub>)<sub>3</sub>]<sup>18-</sup>.<sup>6</sup> (b) Structure of TM-embedded [M<sub>2</sub>Sb<sub>2</sub>W<sub>20</sub>O<sub>70</sub>(H<sub>2</sub>O)<sub>6</sub>]<sup>(14-2n)-</sup> (M<sup>n+</sup> = Co<sup>2+</sup>, Ni<sup>2+</sup>, Mn<sup>2+</sup> or Fe<sup>3+</sup>).<sup>7</sup> (c) Structure of [(SbW<sub>9</sub>O<sub>33</sub>)<sub>4</sub>(WO<sub>2</sub>(H<sub>2</sub>O))<sub>2</sub>Ce<sub>3</sub>(H<sub>2</sub>O)<sub>8</sub>(Sb<sub>4</sub>O<sub>4</sub>)]<sup>19-</sup>.<sup>8</sup> (d) Structure of {[Ln<sub>4</sub>(H<sub>2</sub>O)<sub>6</sub>Sb<sub>6</sub>O<sub>4</sub>](SbW<sub>10</sub>O<sub>37</sub>)<sub>2</sub>(SbW<sub>8</sub>O<sub>31</sub>)<sub>2</sub>]<sup>22-</sup> (Ln = Dy<sup>3+</sup>, Er<sup>3+</sup>, Y<sup>3+</sup>, Ho<sup>3+</sup>).<sup>9</sup> (e) Structure of [Sb<sup>III</sup><sub>9</sub>Sb<sup>V</sup>Ln<sub>3</sub>O<sub>14</sub>(H<sub>2</sub>O)<sub>3</sub>][(SbW<sub>9</sub>O<sub>33</sub>)<sub>3</sub>(PW<sub>9</sub>O<sub>34</sub>)]<sup>23-</sup> (Ln = Ce<sup>3+</sup>, Sm<sup>3+</sup>, Eu<sup>3+</sup>, Gd<sup>3+</sup>, Tb<sup>3+</sup>, Dy<sup>3+</sup>).<sup>10</sup> (f) Structure of [Sb<sub>15</sub>Tb<sub>7</sub>W<sub>3</sub>O<sub>29</sub>(OH)<sub>3</sub>(DMF)(H<sub>2</sub>O)<sub>6</sub>(SbW<sub>8</sub>O<sub>30</sub>)(SbW<sub>9</sub>O<sub>33</sub>)<sub>5</sub>]<sup>27-</sup>.<sup>11</sup> (g) Structure of [Sb<sub>7</sub>W<sub>36</sub>O<sub>133</sub>Ln<sub>3</sub>M<sub>2</sub>(CH<sub>3</sub>COO)(H<sub>2</sub>O)<sub>8</sub>]<sup>17-</sup> (Ln = La<sup>3+</sup>–Gd<sup>3+</sup>, M = Co<sup>2+</sup>; Ln = Ce<sup>3+</sup>, M = Ni<sup>2+</sup>, Zn<sup>2+</sup>).<sup>12</sup> (h) Structure of [Ln<sub>3</sub>Ni<sub>9</sub>(OH)<sub>9</sub>(SbW<sub>9</sub>O<sub>33</sub>)<sub>2</sub>(PW<sub>9</sub>O<sub>34</sub>)<sub>3</sub>(CH<sub>3</sub>COO)<sub>3</sub>]<sup>30-</sup> (Ln = Dy<sup>3+</sup>, Er<sup>3+</sup>).<sup>13</sup> (i) Structure of {[Ln<sub>3</sub>(CH<sub>3</sub>COO)<sub>3</sub>(HPO<sub>3</sub>)(WO<sub>4</sub>)](B- $\alpha$ -SbW<sub>9</sub>O<sub>33</sub>)<sub>3</sub>]<sup>25-</sup> (Ln = Eu<sup>3+</sup>, Dy<sup>3+</sup>, Ho<sup>3+</sup>, Er<sup>3+</sup>).<sup>14</sup> (j) Structure of [Ln(H<sub>2</sub>O)<sub>8</sub>]<sub>2</sub>[Fe<sub>4</sub>(H<sub>2</sub>O)<sub>8</sub>(thr)<sub>2</sub>](B- $\beta$ -SbW<sub>9</sub>O<sub>33</sub>)<sub>2</sub> (thr = L-threonine, Ln = Pr<sup>3+</sup>, Nd<sup>3+</sup>, Sm<sup>3+</sup>, Eu<sup>3+</sup>, Gd<sup>3+</sup>, Dy<sup>3+</sup>, Lu<sup>3+</sup>).<sup>15</sup> (k) Structure of [Ln<sub>4</sub>(HP<sup>III</sup>)W<sub>8</sub>(H<sub>2</sub>O)<sub>12</sub>(H<sub>2</sub>ptca)<sub>2</sub>O<sub>28</sub>][SbW<sub>9</sub>O<sub>33</sub>]<sub>2</sub><sup>12-</sup> (H<sub>3</sub>ptca = 1,2,3-propanetricarboxylic acid, Ln = La<sup>3+</sup>, Ce<sup>3+</sup>, Pr<sup>3+</sup>).<sup>16</sup> (l) Structure of [Ln<sub>4</sub>(H<sub>2</sub>O)<sub>14</sub>W<sub>7</sub>O<sub>15</sub>(H<sub>2</sub>MA)<sub>4</sub>][SbW<sub>9</sub>O<sub>33</sub>]<sub>2</sub>[HP<sup>III</sup>Sb<sup>III</sup>W<sub>15</sub>O<sub>54</sub>]<sub>2</sub><sup>20-</sup> (H<sub>3</sub>MA = DL-malic acid, Ln = Pr<sup>3+</sup>, Nd<sup>3+</sup>).<sup>17</sup> (m) Structures of [Ln<sub>2</sub>(H<sub>2</sub>O)<sub>4</sub>{WO<sub>2</sub>(pic)}<sub>2</sub>(SbW<sub>8</sub>O<sub>30</sub>)<sub>2</sub>]<sup>10-</sup> (Ln = La<sup>3+</sup>, Pr<sup>3+</sup>) and {[Ln(H<sub>2</sub>O)]{Ln(pic)}(Sb<sub>3</sub>O<sub>4</sub>)(SbW<sub>8</sub>O<sub>31</sub>)(SbW<sub>10</sub>O<sub>35</sub>)<sub>2</sub>]<sup>24-</sup> (Hpic = picolinic acid, Ln = Tb<sup>3+</sup>, Dy<sup>3+</sup>, Ho<sup>3+</sup>).<sup>18</sup> (n) Structure of [Ce(H<sub>2</sub>O)<sub>5</sub>(2,6-pdca)]<sub>4</sub>[Fe<sub>4</sub>(H<sub>2</sub>O)<sub>6</sub>(B- $\beta$ -SbW<sub>9</sub>O<sub>33</sub>)<sub>2</sub>]<sup>2-</sup> (2,6-H<sub>2</sub>pdca = 2,6-pyridine-dicarboxylic acid).<sup>19</sup> Color codes: C, black; O, red; N, blue; Ln, plum; TM, yellow; Sb, orange; P, rose; W, turquoise balls; pale blue octahedra).



**Fig. S2** Comparison of experimental PXRD and the corresponding simulated XRD patterns of **1**.



**Fig. S3** The IR spectrum of **1**.

The IR spectrum of crystalline **1** has been measured using the solid sample palletized with KBr (Fig. S3), it can be found that a strong and wide absorption band at 3468–3395  $\text{cm}^{-1}$  is assigned as the stretching vibration from O–H groups of lattice and coordination water molecules. And the weak absorption band appearing at 3174–3166  $\text{cm}^{-1}$  and the weak absorption band at 2802–2782  $\text{cm}^{-1}$  respectively correspond to the stretching vibrations of N–H and C–H bonds from  $[\text{H}_2\text{N}(\text{CH}_3)_2]^+$  cations.<sup>20,21</sup> In the middle wavenumber region, one sharp absorption band at 1634–1626  $\text{cm}^{-1}$  is derived from the bending vibration from O–H bands of lattice and coordination water molecules, the weak band at 1466–1463  $\text{cm}^{-1}$  stems from the bending vibration of the C–H bands of  $[\text{H}_2\text{N}(\text{CH}_3)_2]^+$  cations and the weak peaks at 1106  $\text{cm}^{-1}$  and 1063  $\text{cm}^{-1}$  are ascribed to the stretching vibrations of the P–O bands of OPA ligands.<sup>14</sup> In the low wavenumber region, the characteristic vibration peaks of the polyanion skeleton of **1** are observed at 950  $\text{cm}^{-1}$  ( $\nu_{\text{W-Ot}}$ ), 869  $\text{cm}^{-1}$  ( $\nu_{\text{W-ob}}$ ) and 782  $\text{cm}^{-1}$  ( $\nu_{\text{W-oc}}$ ) and 683  $\text{cm}^{-1}$  ( $\nu_{\text{Sb-o}}$ ).<sup>16</sup>



Fig. S4 The TG curve of **1**.

For the sake of exploring the thermal stability of **1**, the TG measurement was carried out from 25 to 1000 °C under a N<sub>2</sub> atmosphere at a heating rate of 10 °C min<sup>-1</sup>. The TG curve suggests that **1** undergoes three steps weight loss (Fig. S4). From 25 to 250 °C, the first weight loss of 8.75% (calcd. 8.83%) is attributed to the liberation of sixty-six lattice water molecules and two coordination water molecules. With temperature increasing from 250 to 800 °C, the second weight loss of 7.23% (calcd. 7.41%) is assigned to the removal of nine dimethylamine groups, the dehydration of six protons and two Hgps ligands. Subsequently, the skeleton of **1** begins to collapse as the temperature further increases (> 800 °C) and some of WO<sub>3</sub> begin to sublime.



Fig. S5 The {Ce<sub>3</sub>W<sub>8</sub>(Hgps)<sub>2</sub>} core surrounded by four trivacant {SbW<sub>9</sub>} SBUs via twelve μ<sub>2</sub>-O and ten μ<sub>3</sub>-O atoms.



Fig. S6 The dihedral angle between the Sb1W<sub>9</sub>-Sb2W<sub>9</sub>-Sb3W<sub>9</sub> plane and Sb2W<sub>9</sub>-Sb3W<sub>9</sub>-Sb4W<sub>9</sub> plane in **1a**.



**Fig. S7** (a) The dumbbell-shaped heterometallic  $\{\text{Ce}_3\text{W}_8(\text{Hgps})_2\}$  cluster in **1a** and the breakdown drawing of the  $\{\text{Ce}_3\text{W}_8(\text{Hgps})_2\}$  cluster. (b) Combination of  $\text{Hgps}^{4-}$ ,  $\{\text{CeW}_4\}$  and  $\text{Ce}^{23+}$ .



**Fig. S8** (a) Structure of **1a**. (b) Structure of **1a** after the removal of  $\text{Hgps}^{4-}$  ligands.



**Fig. S9** The mon capped square antiprismatic geometries of  $\text{Ce}_1^{3+}$  and  $\text{Ce}_3^{3+}$  ions and the bicapped trigonal prismatic configuration of the  $\text{Ce}_2^{3+}$  ion.

Three crystallographically independent  $\text{Ce}^{3+}$  ions in **1a** adopt two different coordination geometries.  $\text{Ce}_1^{3+}$  and  $\text{Ce}_3^{3+}$  ions reside in the nine-coordinate distorted mon capped square antiprismatic geometry, in which the coordination sphere of the  $\text{Ce}_1^{3+}$  ion is established by five O atoms (O18, O28, O30, O23, O65) from the  $\{\text{SbW}_9\}$  SBU, two O atoms (O45, O103) from the  $\text{Hgps}^{4-}$  ligand and two O atoms (O34, O46) from the  $\{\text{W}_4\}$  unit. The coordination geometry of the  $\text{Ce}_3^{3+}$  ion is formed by five O atoms (O20, O22, O57, O87, O96) from the  $\{\text{SbW}_9\}$  SBU, two O atoms (O52, O74) from the  $\text{Hgps}^{4-}$  ligand and two O atoms (O39, O80) from the  $\{\text{W}_4\}$  unit. The  $\text{Ce}_2^{3+}$  ion displays an eight-coordinate twisted bicapped trigonal prismatic geometry that is established by two O atoms (O73 and O91) of two  $\text{Hgps}^{4-}$  ligands and four O atoms (O68, O140, O147 and O160) from the  $\{\text{SbW}_9\}$  SBU and two water ligands (O1W and O2W).



**Fig. S10** (a–c) Packing architectures of **1** with a regular –ABAB– arrangement fashion in *bc*, *ac* or *ab* planes. (d–f) Simplified quadrilateral of the **1a** polyanion viewed along *bc*, *ac* or *ab* planes. (g–i) Simplified packing representations of **1a** polyanions viewed along *bc*, *ac* or *ab* plane.



**Fig. S11** (a) Hydrogen-bonding interactions between N atoms on  $[\text{H}_2\text{N}(\text{CH}_3)_2]^+$  cations and surface O atoms of **1a** polyanions. (b) The distances between donor N9 atom and acceptor O atoms.

The **1a** polyanions regularly stack in a –ABAB– mode in *ab*, *ac* or *bc* plane (Fig.S10a–c). If each **1a** polyanion is simplified as a quadrilateral (Fig. S10d–f), the spatial packing for **1a** polyanions could be easier to understand (Fig. S10g–i). Along the *a* and *b* axes, neighboring **1a** polyanions are arranged in parallel, but along the *c* axis, adjacent

**1a** polyanions are arranged in the opposite patterns. Space utilization is able to effectively increase by the opposite arrangement of **1a** polyanions and access the most closely packing fashion. Besides, the space of **1a** polyanions was full of  $[\text{H}_2\text{N}(\text{CH}_3)_2]^+$  cations and crystal water molecules. The hydrogen-bonding interactions between nitrogen atoms on  $[\text{H}_2\text{N}(\text{CH}_3)_2]^+$  cations and oxygen atoms on the surface of **1a** polyanions and water molecules exist in the orderly stacking (Fig. S11a). It can be clearly observed that N–H···O distances are in 2.85(4)–3.30(2) Å (Fig. S11b).



**Fig. S12** (a) A mixture of **1**, GO and  $\text{N}_2\text{H}_4$  after reaction for 2h at 60°C. (b) A mixture of GO and  $\text{N}_2\text{H}_4$  after reaction for 2 h at 60°C.



**Fig. S13** (a) Comparison of IR spectra of **1'** (red) obtained by re-precipitating **1** with using CsCl in water and **1** (blue). (b) Comparison of Raman spectra of **1** in water solution (black) and **1** in solid state (red). It's worth noting that the low signal intensity of **1** in water is most likely due to the low solubility of **1**. (c) Comparison of UV-vis spectra of **1** in water under different storage times.



| <i>z</i>       | <i>m/z</i> (exp) | <i>m/z</i> (calc) | Assignment                                                                                                                           |
|----------------|------------------|-------------------|--------------------------------------------------------------------------------------------------------------------------------------|
| 5 <sup>-</sup> | 1230.562         | 1230.453          | $\{\text{Na}_3\text{H}_4[\text{Ce}_2(\text{H}_2\text{O})_2\text{W}_4(\text{Hgps})\text{O}_{10}][\text{SbW}_9\text{O}_{33}]_2\}^{5-}$ |
| 5 <sup>-</sup> | 1263.736         | 1263.568          | $\{\text{Na}_2[\text{H}_2\text{N}(\text{CH}_3)_2]_8[\text{CeW}_4(\text{Hgps})\text{O}_{10}][\text{SbW}_9\text{O}_{33}]_2\}^{5-}$     |
| 4 <sup>-</sup> | 1544.033         | 1543.814          | $\{\text{Na}_4\text{H}_4[\text{Ce}_2(\text{H}_2\text{O})_2\text{W}_4(\text{Hgps})\text{O}_{10}][\text{SbW}_9\text{O}_{33}]_2\}^{4-}$ |
| 4 <sup>-</sup> | 1585.423         | 1585.208          | $\{\text{Na}_3[\text{H}_2\text{N}(\text{CH}_3)_2]_8[\text{CeW}_4(\text{Hgps})\text{O}_{10}][\text{SbW}_9\text{O}_{33}]_2\}^{4-}$     |

**Fig. S14** The ESI-MS spectrum of **1** in aqueous solution and peak assignments with proposed formula and charge.

As shown in the electrospray ionization mass spectrometry (ESI-MS) of **1** in aqueous solution (Fig. S14), the  $m/z = 1230.562$  (5-) peak is assigned to  $\{\text{Na}_3\text{H}_4[\text{Ce}_2(\text{H}_2\text{O})_2\text{W}_4(\text{Hgps})\text{O}_{10}][\text{SbW}_9\text{O}_{33}]_2\}^{5-}$ , the  $m/z = 1263.736$  (5-) peak is assigned to  $\{\text{Na}_2[\text{H}_2\text{N}(\text{CH}_3)_2]_8[\text{CeW}_4(\text{Hgps})\text{O}_{10}][\text{SbW}_9\text{O}_{33}]_2\}^{5-}$ , the  $m/z = 1544.033$  (4-) peak is assigned to  $\{\text{Na}_4\text{H}_4[\text{Ce}_2(\text{H}_2\text{O})_2\text{W}_4(\text{Hgps})\text{O}_{10}][\text{SbW}_9\text{O}_{33}]_2\}^{4-}$ , the  $m/z = 1585.423$  (4-) peak is assigned to  $\{\text{Na}_3[\text{H}_2\text{N}(\text{CH}_3)_2]_8[\text{CeW}_4(\text{Hgps})\text{O}_{10}][\text{SbW}_9\text{O}_{33}]_2\}^{4-}$ . The experimental  $m/z$  values (1230.562, 1263.736, 1544.033, 1585.423) are in good agreement calculated  $m/z$  values (1230.453, 1263.568, 1543.814, 1585.208) of **1**, which prove the good stability of the polyoxoanion of **1** in aqueous solution.



**Fig. S15** The TEM-EDS elemental mapping images for the rGO-1 with W, Sb, Ce, P, C and N elements.



**Fig. S16** (a) IR spectra of GO, **1**, rGO-1 and Au-rGO-1. (b) IR spectra of GO, **1** and rGO-1. (c) Raman spectra of GO, **1**, rGO-1 and Au-rGO-1.



**Fig. S17** The SEM-EDS elemental mapping images for the Au-rGO-1 with W, Au, C, N, Sb, Ce and P elements.



**Fig. S18** The Zeta potentials of GO, rGO-1 and Au-rGO-1.



**Fig. S19** (a) SWV curves of Au-rGO-1/GCEs stored for different times at room temperature in the  $[Fe(CN)_6]^{3-/4-}-K$  solution. (b) SWV curves of bare GCEs stored for different times at room temperature in the  $[Fe(CN)_6]^{3-/4-}-K$  solution.



**Fig. S20** Schematic preparation of Au-rGO-1/GCE.



**Fig. S21** CV curves of each modified electrode (bare GCE, Au-rGO-1/GCE, c-DNA/Au-rGO-1/GCE, MH-treated c-DNA/Au-rGO-1/GCE, dsDNA/Au-rGO-1/GCE and MB/dsDNA/Au-rGO-1/GCE) in the  $[\text{Fe}(\text{CN})_6]^{3-/4-}$ -K solution.

In order to explain the change of electrode surface and provide persuasive evidence of the construction of the MB/dsDNA/Au-rGO-1/GCE EDB. The current signal of each modified electrode (bare GCE, Au-rGO-1/GCE, c-DNA/Au-rGO-1/GCE, MH-treated c-DNA/Au-rGO-1/GCE, dsDNA/Au-rGO-1/GCE and MB/dsDNA/Au-rGO-1/GCE) was monitored by CV method in the  $[\text{Fe}(\text{CN})_6]^{3-/4-}$ -K solution. As shown in Fig. S21, the peak current observably increases compared with bare GCE when Au-rGO-1 is assembled on the surface of electrode, indicating that Au-rGO-1/GCE performs excellent electron transfer property, which is beneficial for improving the sensitivity of the biosensor. After attachment of c-DNA on the Au-rGO-1/GCE surface, the peak current clearly decreases, resulting from the reduction of electrical conductivity due to the electrostatic repulsion between c-DNA with  $[\text{Fe}(\text{CN})_6]^{3/4-}$ . Moreover, with the introduction of MH, the superfluous Au NPs are blocked accompanying with the decrease of active area, leading to decline of the peak current. After t-DNA was immobilized on the MH-treated c-DNA/Au-rGO-1/GCE surface by hybridizing with c-DNA forming double-stranded DNA (dsDNA) on the electrode surface (dsDNA/Au-rGO-1/GCE), the dsDNA further increases the negative charge, resulting in the further decrease of the peak current. Finally, the introduction of MB brings greater steric hindrance, which makes the peak current drop again. All of the above results successfully demonstrate the electrode surface change and provide persuasive evidence of the construction of MB/dsDNA/Au-rGO-1/GCE.



**Fig. S22** (a) SWV curves of MB/dsDNA/Au-rGO-1/GCEs constructed by using different concentrations of t-DNA ( $10^{-14}$  /  $10^{-13}$  /  $10^{-12}$  /  $10^{-11}$  /  $10^{-10}$  /  $10^{-9}$  /  $10^{-8}$  /  $10^{-7}$  M). (b) SWV curves of the specificity of MB/dsDNA/Au-rGO-1/GCE EDB for different DNA sequences. (c) SWV curves of the anti-interference capability of MB/dsDNA/Au-rGO-1/GCE EDB different interference DNA sequences. (d) The time-dependent stability of MB/dsDNA/Au-rGO-1/GCE EDB for t-DNA detection after stored for 2, 3, 4, 5, 6 and 7 days. (e) The repeatability of five MB/dsDNA/Au-rGO-1/GCE EDBs. (f) SWV curves of MB/dsDNA/Au-rGO-1/GCEs constructed by using different concentrations of t-DNA ( $10^{-13}$  /  $10^{-12}$  /  $10^{-11}$  /  $10^{-10}$  /  $10^{-9}$  /  $10^{-8}$  M) in human serum solution diluted 1000 times by using the Tris-HCl solution.

**Table S1 Brief summary of experimental conditions of OLLFATs.**

| OLLFATs                                                                                                                                                                                                                                                                                                                                                                            | Raw materials                                                                                                                                                                              | pH        | Reaction medium                                           | Temperature (°C) | Ref       |
|------------------------------------------------------------------------------------------------------------------------------------------------------------------------------------------------------------------------------------------------------------------------------------------------------------------------------------------------------------------------------------|--------------------------------------------------------------------------------------------------------------------------------------------------------------------------------------------|-----------|-----------------------------------------------------------|------------------|-----------|
| [Sb <sub>7</sub> W <sub>36</sub> O <sub>133</sub> Ln <sub>3</sub> M <sub>2</sub> (CH <sub>3</sub> COO)(H <sub>2</sub> O) <sub>8</sub> ] <sup>17-</sup><br>(Ln = La <sup>3+</sup> –Gd <sup>3+</sup> , M = Co <sup>2+</sup> ; Ln = Ce <sup>3+</sup> , M = Ni <sup>2+</sup> , Zn <sup>2+</sup> )                                                                                      | {SbW <sub>9</sub> }, MCl <sub>2</sub> ·6H <sub>2</sub> O (Co or Ni) / Zn(NO <sub>3</sub> ) <sub>2</sub> ·6H <sub>2</sub> O<br>Ln(NO <sub>3</sub> ) <sub>3</sub> ·6H <sub>2</sub> O         | 4.60      | CH <sub>3</sub> COOH–<br>CH <sub>3</sub> COONa<br>(1.0 M) | 90               | 12        |
| [Ln <sub>3</sub> Ni <sub>9</sub> (OH) <sub>9</sub> (SbW <sub>9</sub> O <sub>33</sub> ) <sub>2</sub> (PW <sub>9</sub> O <sub>34</sub> ) <sub>3</sub> (CH <sub>3</sub> COO) <sub>3</sub> ] <sup>30-</sup> (Ln = Dy <sup>3+</sup> , Er <sup>3+</sup> )                                                                                                                                | {SbW <sub>9</sub> }, NiCl <sub>2</sub> ·6H <sub>2</sub> O,<br>Ln(NO <sub>3</sub> ) <sub>3</sub> ·6H <sub>2</sub> O, KH <sub>2</sub> PO <sub>4</sub>                                        | 5.50      | CH <sub>3</sub> COOH–<br>CH <sub>3</sub> COONa<br>(1.0 M) | 80               | 13        |
| [Dy <sub>3</sub> (CH <sub>3</sub> COO) <sub>3</sub> (HPO <sub>3</sub> )(WO <sub>4</sub> )] [B-α-SbW <sub>9</sub> O <sub>33</sub> ] <sub>3</sub> <sup>25-</sup> (Ln = Eu <sup>3+</sup> , Dy <sup>3+</sup> , Ho <sup>3+</sup> , Er <sup>3+</sup> )                                                                                                                                   | {SbW <sub>9</sub> }, Na <sub>2</sub> WO <sub>4</sub> ·2H <sub>2</sub> O,<br>KCl, H <sub>3</sub> PO <sub>3</sub> ,<br>Ln(NO <sub>3</sub> ) <sub>3</sub> ·6H <sub>2</sub> O                  | 5.50      | CH <sub>3</sub> COOH–<br>CH <sub>3</sub> COONa<br>(2.0 M) | 90               | 14        |
| [Ln(H <sub>2</sub> O) <sub>8</sub> ] <sub>2</sub> [Fe <sub>4</sub> (H <sub>2</sub> O) <sub>8</sub> (thr) <sub>2</sub> ] [B-β-SbW <sub>9</sub> O <sub>33</sub> ] <sub>2</sub> (Ln = Pr <sup>3+</sup> , Nd <sup>3+</sup> , Sm <sup>3+</sup> , Eu <sup>3+</sup> , Gd <sup>3+</sup> , Dy <sup>3+</sup> , Lu <sup>3+</sup> )                                                            | {SbW <sub>9</sub> }, FeCl <sub>3</sub> ·6H <sub>2</sub> O,<br>PrCl <sub>3</sub> , L-threonine                                                                                              | 1.09–1.20 | water                                                     | 80               | 15        |
| [Ce <sub>4</sub> (HP)W <sub>8</sub> (H <sub>2</sub> O) <sub>12</sub> (H <sub>2</sub> ptca) <sub>2</sub> O <sub>28</sub> ]<br>[SbW <sub>9</sub> O <sub>33</sub> ] <sub>2</sub> <sup>12-</sup> (Ln = La <sup>3+</sup> , Ce <sup>3+</sup> , Pr <sup>3+</sup> )<br>[Ln <sub>4</sub> (H <sub>2</sub> O) <sub>14</sub> W <sub>7</sub> O <sub>15</sub> (H <sub>2</sub> MA) <sub>4</sub> ] | {SbW <sub>9</sub> }, itaconic acid,<br>Ln(CH <sub>3</sub> COO) <sub>3</sub> , H <sub>3</sub> PO <sub>3</sub> ,<br>{SbW <sub>9</sub> }, Na <sub>2</sub> WO <sub>4</sub> ·2H <sub>2</sub> O, | 3.80–4.20 | water                                                     | 90               | 16        |
| [SbW <sub>9</sub> O <sub>33</sub> ] <sub>2</sub> [HPSbW <sub>15</sub> O <sub>54</sub> ] <sub>2</sub> <sup>20-</sup> (Ln = Nd <sup>3+</sup> , Pr <sup>3+</sup> )                                                                                                                                                                                                                    | DL-malic acid,<br>Ln(CH <sub>3</sub> COO) <sub>3</sub> , H <sub>3</sub> PO <sub>3</sub>                                                                                                    | 3.00      | water                                                     | 90               | 17        |
| [Ln <sub>2</sub> (H <sub>2</sub> O) <sub>4</sub> {WO <sub>2</sub> (pic)} <sub>2</sub> (SbW <sub>8</sub> O <sub>30</sub> ) <sub>2</sub> ] <sup>10-</sup><br>(Ln = La <sup>3+</sup> , Pr <sup>3+</sup> )                                                                                                                                                                             | {SbW <sub>9</sub> }, Ln(NO <sub>3</sub> ) <sub>3</sub> ·6H <sub>2</sub> O,<br>2-picolinic acid, LiCl                                                                                       | 5.00      | water                                                     | 90               | 18        |
| {[Ln(H <sub>2</sub> O)]{Ln(pic)}(Sb <sub>3</sub> O <sub>4</sub> )(SbW <sub>8</sub> O <sub>31</sub> )(SbW <sub>10</sub> O <sub>35</sub> ) <sub>2</sub> ] <sup>24-</sup> (Ln = Tb <sup>3+</sup> , Dy <sup>3+</sup> , Ho <sup>3+</sup> )                                                                                                                                              | {SbW <sub>9</sub> }, Ln(NO <sub>3</sub> ) <sub>3</sub> ·6H <sub>2</sub> O,<br>2-picolinic acid, LiCl,<br>Sb <sub>2</sub> O <sub>3</sub>                                                    | 6.50      | water                                                     | 90               | 18        |
| [Ce(H <sub>2</sub> O) <sub>5</sub> (2,6-pdca)] <sub>4</sub> H <sub>2</sub><br>[Fe <sub>4</sub> (H <sub>2</sub> O) <sub>6</sub> (SbW <sub>9</sub> O <sub>33</sub> ) <sub>2</sub> ]                                                                                                                                                                                                  | {SbW <sub>9</sub> }, Ce(NO <sub>3</sub> ) <sub>3</sub> ·6H <sub>2</sub> O<br>2,6-pyridine dicarboxylic acid, FeCl <sub>3</sub> ·6H <sub>2</sub> O                                          | 2.20      | water                                                     | 80               | 19        |
| [(Ln(H <sub>2</sub> O)(OH) <sub>2</sub> (CH <sub>3</sub> COO)) <sub>3</sub> (WO <sub>4</sub> )(SbW <sub>9</sub> O <sub>33</sub> ) <sub>3</sub> ] <sup>21-</sup> (Ln = Tb <sup>3+</sup> , Dy <sup>3+</sup> , Ho <sup>3+</sup> , Er <sup>3+</sup> , Y <sup>3+</sup> )                                                                                                                | {SbW <sub>9</sub> }, Ln(NO <sub>3</sub> ) <sub>3</sub> ·6H <sub>2</sub> O                                                                                                                  | 5.50      | CH <sub>3</sub> COOH–<br>CH <sub>3</sub> COONa<br>(2.0 M) | 80               | 22        |
| [H <sub>2</sub> N(CH <sub>3</sub> ) <sub>2</sub> ] <sub>9</sub> Na <sub>12</sub> H <sub>6</sub> {[Ce <sub>3</sub> (H <sub>2</sub> O) <sub>2</sub> W <sub>8</sub> (Hgps) <sub>2</sub> O <sub>20</sub> ][B-α-SbW <sub>9</sub> O <sub>33</sub> ] <sub>4</sub> }·66H <sub>2</sub> O                                                                                                    | SbCl <sub>3</sub> , Na <sub>2</sub> WO <sub>4</sub> ·2H <sub>2</sub> O,<br>Ce(NO <sub>3</sub> ) <sub>3</sub> ·6H <sub>2</sub> O,<br>glyphosine                                             | 4.80–5.20 | CH <sub>3</sub> COOH–<br>CH <sub>3</sub> COONa<br>(1.5 M) | 90               | This work |

**Table S2 Experimental explorations on the synthesis of 1.**

|                                                                                        | SbCl <sub>3</sub><br>(1.00<br>mM) | Na <sub>2</sub> WO <sub>4</sub> ·<br>2H <sub>2</sub> O | H <sub>5</sub> gps | Ce(NO <sub>3</sub> ) <sub>3</sub> ·<br>6H <sub>2</sub> O | CH <sub>3</sub> COOH-<br>CH <sub>3</sub> COONa | pH   | Growth<br>time | Result (yield)          |
|----------------------------------------------------------------------------------------|-----------------------------------|--------------------------------------------------------|--------------------|----------------------------------------------------------|------------------------------------------------|------|----------------|-------------------------|
| The effect of<br>CH <sub>3</sub> COOH-CH <sub>3</sub><br>COONa buffer<br>concentration | 1.0 mL                            | 5.0 g                                                  | 0.2 g              | 0.2 g                                                    | 0–1.0 M,<br>15mL                               | 5.00 | > 20 days      | <b>1</b> (13.53–15.48%) |
|                                                                                        |                                   |                                                        |                    |                                                          | 1.5–2.0 M,<br>15mL                             |      | 1–2 days       | <b>1</b> (27.83–30.48%) |
| The effect of<br>Ce(NO <sub>3</sub> ) <sub>3</sub> ·6H <sub>2</sub> O<br>amount        | 1.0 mL                            | 5.0 g                                                  | 0.2 g              | 0.1 g                                                    | 1.5 M, 15<br>mL                                | 5.00 | 1–2 days       | <b>1</b> (28.40–33.95%) |
|                                                                                        |                                   |                                                        |                    | 0.2 g                                                    |                                                |      | —              | precipitate             |
|                                                                                        |                                   |                                                        |                    | 0.4 g                                                    |                                                |      | —              | precipitate             |
| The effect of<br>H <sub>5</sub> gps amount                                             | 1.0 mL                            | 5.0 g                                                  | 0.1 g              | 0.2 g                                                    | 1.5 M, 15<br>mL                                | 5.00 | 1–2 days       | <b>1</b> (24.93–32.53%) |
|                                                                                        |                                   |                                                        | 0.2 g              |                                                          |                                                |      | —              | precipitate             |
|                                                                                        |                                   |                                                        | 0.4 g              |                                                          |                                                |      | —              | precipitate             |
|                                                                                        |                                   |                                                        | > 0.4 g            |                                                          |                                                |      | —              | precipitate             |
|                                                                                        |                                   |                                                        | —                  |                                                          |                                                |      | —              | precipitate             |
| The effect of<br>pH variation                                                          | 1.0 mL                            | 5.0 g                                                  | 0.2g               | 0.2 g                                                    | 1.5 M, 15<br>mL                                | 4.00 | —              | precipitate             |
|                                                                                        |                                   |                                                        |                    |                                                          |                                                | 4.20 | —              | precipitate             |
|                                                                                        |                                   |                                                        |                    |                                                          |                                                | 4.40 | > 10 days      | <b>1</b> (14.96–17.28%) |
|                                                                                        |                                   |                                                        |                    |                                                          |                                                | 4.60 |                | and precipitate         |
|                                                                                        |                                   |                                                        |                    |                                                          |                                                | 4.80 | 1–2 days       | <b>1</b> (26.16–31.48%) |
|                                                                                        |                                   |                                                        |                    |                                                          |                                                | 5.20 | —              | precipitate             |
| 5.40                                                                                   | > 10 days                         | <b>1</b> (13.25–15.48%)                                |                    |                                                          |                                                |      |                |                         |
| 5.50                                                                                   | —                                 | precipitate                                            |                    |                                                          |                                                |      |                |                         |

Table S3 Crystallographic data and structure refinements for 1.

| 1                                             |                                                      |
|-----------------------------------------------|------------------------------------------------------|
| Empirical formula                             | $C_{26}H_{228}Ce_3N_{11}Na_{12}O_{236}P_4Sb_4W_{44}$ |
| Formula weight                                | 13868.71                                             |
| Crystal system                                | Monoclinic                                           |
| Space group                                   | Cc                                                   |
| $a$ , Å                                       | 37.8115(8)                                           |
| $b$ , Å                                       | 16.9387(4)                                           |
| $c$ , Å                                       | 41.2813(10)                                          |
| $\alpha$ , deg                                | 90                                                   |
| $\beta$ , deg                                 | 106.1290(10)                                         |
| $\gamma$ , deg                                | 90                                                   |
| $V$ , Å <sup>3</sup>                          | 25399.0(10)                                          |
| $Z$                                           | 4                                                    |
| $\mu$ , mm <sup>-1</sup>                      | 20.938                                               |
| $F(000)$                                      | 24700                                                |
| $D_c$ , g cm <sup>-3</sup>                    | 3.627                                                |
| $T$ , K                                       | 150(2)                                               |
|                                               | $-45 \leq h \leq 44$                                 |
| Limiting indices                              | $-17 \leq k \leq 20$                                 |
|                                               | $-45 \leq l \leq 49$                                 |
| Reflections collected/unique                  | 77019 / 36282                                        |
| $R_{int}$                                     | 0.0332                                               |
| Data/restraints/parameters                    | 36282 / 449 / 2700                                   |
| GOF on $F^2$                                  | 1.064                                                |
| $R_1, wR_2$ ( $I > 2\sigma(I)$ ) <sup>a</sup> | 0.0390, 0.1053                                       |
| $R_1, wR_2$ (all data)                        | 0.0401, 0.1059                                       |

**Table S4 Comparison of the sensitivity of different EDBs for DNA sequence detection.**

| Detection platform | Detection method | Concentration range (M)                     | LOD                    | Ref.      |
|--------------------|------------------|---------------------------------------------|------------------------|-----------|
| 3D G-Au NP/GCE     | DPV              | $1.0 \times 10^{-14} - 1.0 \times 10^{-7}$  | $9.41 \times 10^{-15}$ | 23        |
| G/Au NR/PT/GCE     | DPV              | $1.0 \times 10^{-13} - 1.0 \times 10^{-10}$ | $4.03 \times 10^{-14}$ | 24        |
| Au NPs/TB-GO/GCE   | DPV              | $1.0 \times 10^{-11} - 1.0 \times 10^{-9}$  | $2.90 \times 10^{-13}$ | 25        |
| Graphene/GCE       | DPV              | $2.0 \times 10^{-14} - 2.0 \times 10^{-9}$  | $8.20 \times 10^{-15}$ | 26        |
| Au-rGO-1/GCE       | SWV              | $1.0 \times 10^{-14} - 1.0 \times 10^{-7}$  | $3.09 \times 10^{-15}$ | This work |

The limit of detection (LOD) is calculated according to  $I_{SWV} + 3\sigma = I = k \lg C_{t-DNA} + b$  ( $I_{SWV}$  is the baseline value calculated as the average of the sensing signal without t-DNA from five experiments, and  $\sigma$  is the standard deviation of five  $I_{SWV}$ ,  $k$  is the slope of the calibration equation,  $b$  is the intercept of the fitting equation,  $C_{t-DNA}$  is the LOD for t-DNA detection).

## References

- G. M. Sheldrick, *SHELXL 97, Program for Crystal Structure Refinement*; University of Göttingen: Göttingen, Germany, 1997.
- G. M. Sheldrick, *SHELXS 97, Program for Crystal Structure Solution*; University of Göttingen: Göttingen, Germany, 1997.
- C. Pichon, A. Dolbecq, P. Mialane, J. Marrot, E. Rivière and F. Sécheresse, Square versus tetrahedral iron clusters with polyoxometalate ligands, *Dalton Trans.*, 2008, **1**, 71–76.
- C. Pichon, A. Dolbecq, P. Mialane, J. Marrot, E. Rivière, M. Goral, M. Zynek, T. McCormac, S. A. Borshch, E. Zueva and F. Sécheresse, Fe<sub>2</sub> and Fe<sub>4</sub> clusters encapsulated in vacant polyoxotungstates: Hydrothermal synthesis, magnetic and electrochemical properties, and DFT calculations, *Chem. Eur. J.*, 2008, **14**, 3189–3199.
- L. L. Liu, J. Jiang, G. P. Liu, X. D. Jia, J. W. Zhao, L. J. Chen and P. Yang, Hexameric to trimeric lanthanide-Included selenotungstates and their 2D honeycomb organic–inorganic hybrid films used for detecting ochratoxin A, *ACS Appl. Mater. Interfaces*, 2021, **13**, 35997–36010.
- T. Yamase, H. Naruke and Y. Sasaki, Crystallographic characterization of the polyoxotungstate [Eu<sub>3</sub>(H<sub>2</sub>O)<sub>3</sub>(SbW<sub>9</sub>O<sub>33</sub>)(W<sub>5</sub>O<sub>18</sub>)<sub>3</sub>]<sup>18-</sup> and energy transfer in its crystalline lattices, *Dalton Trans.*, 1990, **5**, 1687–1696.
- M. Bösing, I. Loose, H. Pohlmann and B. Krebs, New strategies for the generation of large heteropolymetalate clusters: The β-B-SbW<sub>9</sub> fragment as a multifunctional unit, *Chem. Eur. J.*, 1997, **3**, 1232–1237.
- G. L. Xue, J. Vaissermann and P. Gouzerh, Cerium(III) complexes with lacunary polyoxotungstates. Synthesis and structural characterization of a novel heteropolyoxotungstate based on α-[SbW<sub>9</sub>O<sub>33</sub>]<sup>9-</sup> units, *Journal of Cluster Science*, 2002, **13**, 409–421.
- X. Xu, Y. H. Chen, Y. Zhang, Y. F. Liu, L. J. Chen and J. W. Zhao, Rare-earth and antimony-oxo clusters simultaneously connecting antimonotungstates comprising divacant and tetravacant Keggin fragments, *Inorg. Chem.*, 2019, **58**, 11636–11648.
- H.-P. Xiao, R.-T. Zhang, Z. Li, Y.-F. Xie, M. Wang, Y.-D. Ye, C. Sun, Y.-Q. Sun, X.-X. Li and S.-T. Zheng, Organoamine-directed assembly of 5p–4f heterometallic cluster substituted polyoxometalates: Luminescence and proton conduction properties, *Inorg. Chem.*, 2021, **60**, 13718–13726.
- H.-P. Xiao, Y.-S. Hao, X.-X. Li, P. Xu, M.-D. Huang and S.-T. Zheng, A water-soluble antimony-rich polyoxometalate with broad-spectrum antitumor activities, *Angew. Chem. Int. Ed.*, 2022, **61**, e202210019.
- B. Artetxe, S. Reinoso, L. S. Felices, L. Lezama, J. M. Gutiérrez-Zorrilla, C. Vicent, F. Haso and T. B. Liu, New perspectives for old clusters: Anderson–Evans anions as building blocks of large polyoxometalate frameworks in a series of heterometallic 3d–4f species, *Chem. Eur. J.*, 2016, **22**, 4616–4625.
- J. Cai, X.-Y. Zheng, J. Xie, Z.-H. Yan, X.-J. Kong, Y.-P. Ren, L.-S. Long and L.-S. Zheng, Anion-dependent assembly of heterometallic 3d–4f clusters based on a lacunary polyoxometalate, *Inorg. Chem.*, 2017, **56**, 8439–8445.
- X. Xu, X. Y. Liu, D. Wang, X. J. Liu, L. J. Chen and J. W. Zhao, {HPO<sub>3</sub>} and {WO<sub>4</sub>} simultaneously induce the assembly of tri-Ln(III)-incorporated antimonotungstates and their photoluminescence behaviors, *Inorg. Chem.*, 2021, **60**, 1037–1044.

- 15 J.-W. Zhao, J. Cao, Y.-Z. Li, J. Zhang and L.-J. Chen, First tungstoantimonate-based transition-metal–lanthanide heterometallic hybrids functionalized by amino acid ligands, *Cryst. Growth Des.*, 2014, **14**, 6217–6229.
- 16 S. S. Xie, J. Jiang, D. Wang, Z. G. Tang, R. F. Mi, L. J. Chen and J.W. Zhao, Tricarboxylic-ligand-decorated lanthanoid-inserted heteropolyoxometalates built by mixed-heteroatom-directing polyoxotungstate units: Syntheses, structures, and electrochemical sensing for 17 $\beta$ -estradiol, *Inorg. Chem.*, 2021, **60**, 7536–7544.
- 17 S. S. Xie, D. Wang, Z. X. Wang, J. C. Liu, L. J. Chen and J. W. Zhao, Dual-heteroatom-templated lanthanoid-inserted heteropolyoxotungstates simultaneously comprising Dawson and Keggin subunits and their composite film applied for electrochemical immunosensing of auximone, *Inorg. Chem. Front.*, 2022, **9**, 350–362.
- 18 L.-L. Li, H.-Y. Han, Y.-H. Wang, H.-Q. Tan, H.-Y. Zang and Y.-G. Li, Construction of polyoxometalates from dynamic lacunary polyoxotungstate building blocks and lanthanide linkers, *Dalton Trans.*, 2015, **44**, 11429–11436.
- 19 B. X. Zeng, Y. Zhang, Y. H. Chen, G. P. Liu, Y. Z. Li, L. J. Chen and J. W. Zhao, 3-D antimonotungstate framework based on 2,6-H<sub>2</sub>pdca-connecting iron–cerium heterometallic Krebs-type polyoxotungstates for detecting small biomolecules, *Inorg. Chem.*, 2021, **60**, 2663–2671.
- 20 J. W. Zhao, C. M. Wang, J. Zhang, S. T. Zheng and G. Y. Yang, Combination of lacunary polyoxometalates and high-nuclear transition metal clusters under hydrothermal conditions: IX. A series of novel polyoxotungstates sandwiched by octa-copper clusters, *Chem. Eur. J.*, 2008, **14**, 9223–9239.
- 21 R. Chris, B. Valérie, G. M. Evan, R. Christian and B. Colette, Sensitization of lanthanoid luminescence by organic and inorganic ligands in lanthanoid-organic-polyoxometalates, *Inorg. Chem.*, 2012, **51**, 1142–1151.
- 22 E. Tanuhadi, E. Al-Sayed, G. Novitchi, A. Roller, G. Giester and A. Rompel, Cation-directed synthetic strategy using 4f tungstoantimonates as nonlacunary precursors for the generation of 3d–4f clusters, *Inorg. Chem.*, 2020, **59**, 8461–8467.
- 23 S. Q. Chen, Y. F. Cheng and G. Voordouw, Three-dimensional graphene nanosheet doped with gold nanoparticles as electrochemical DNA biosensor for bacterial detection, *Sens. Actuators, B*, 2018, **262**, 860–868.
- 24 H. Y. Huang, W. Q. Bai, C. X. Dong, R. Guo and Z. H. Liu, An ultrasensitive electrochemical DNA biosensor based on graphene/Au nanorod/polythionine for human papillomavirus DNA detection, *Biosens. Bioelectron.*, 2015, **68**, 442–446.
- 25 H.-P. Peng, Y. Hu, P. Liu, Y.-N. Deng, P. Wang, W. Chen, A.-L. Liu, Y.-Z. Chen and X.-H. Lin, Label-free electrochemical DNA biosensor for rapid detection of multidrug resistance gene based on Au nanoparticles/toluidine blue–graphene oxide nanocomposites, *Sens. Actuators, B*, 2015, **207**, 269–276.
- 26 Z. J. Yin, H. F. Cui, Q. X. Shu, C. Jin, Y. Lin, J. Su, H. L. Huang, F. S. Liao, G. Q. Ma, N. Hong, Y. F. Jiang and H. Fan, Multi-signal amplification electrochemical DNA biosensor based on exonuclease III and tetraferrocene, *J. Mater. Chem. B*, 2020, **8**, 4143–4150.
